# Supplementary material for: Weak-field ligands enable inert early transition metal oxides to convert methane to methanol: the case of ZrO
Source: Royal Society of Chemistry journal article supplement (doi:10.1039/c9cp06050b), 2020-01-01
Supplement: c9cp06050b1.pdf [file c9cp06050b1.pdf]

## Electronic Supplementary Information

# Weak-field Ligands Enable Inert Early Transition Metal Oxides to Convert Methane to Methanol: The Case of ZrO

*Benjamin A. Jackson and Evangelos Miliordos\**

Department of Chemistry and Biochemistry, Auburn University, Auburn, AL 36849-5312, USA

**Corresponding Author**

\* E-mail: [emiliord@auburn.edu](mailto:emiliord@auburn.edu)

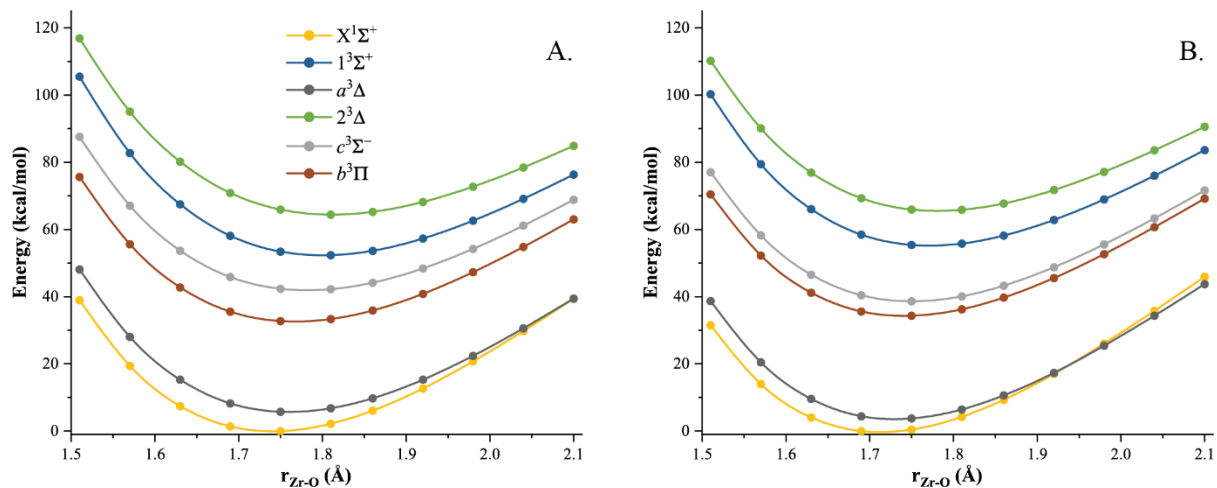

**Figure S1.** CCSD(T)/5Z PECs of ZrO with respect to Zr-O distance without and including the correlation energy of the zirconium sub-valence  $4s^24p^6$  electrons. Shown in 5A is CCSD(T) and in 5B is C-CCSD(T). The zero of each scale is set equal to the equilibrium energy of the ground state  $X^1\Sigma^+$  at the corresponding CCSD(T)/5Z level or C-CCSD(T)/5Z level.

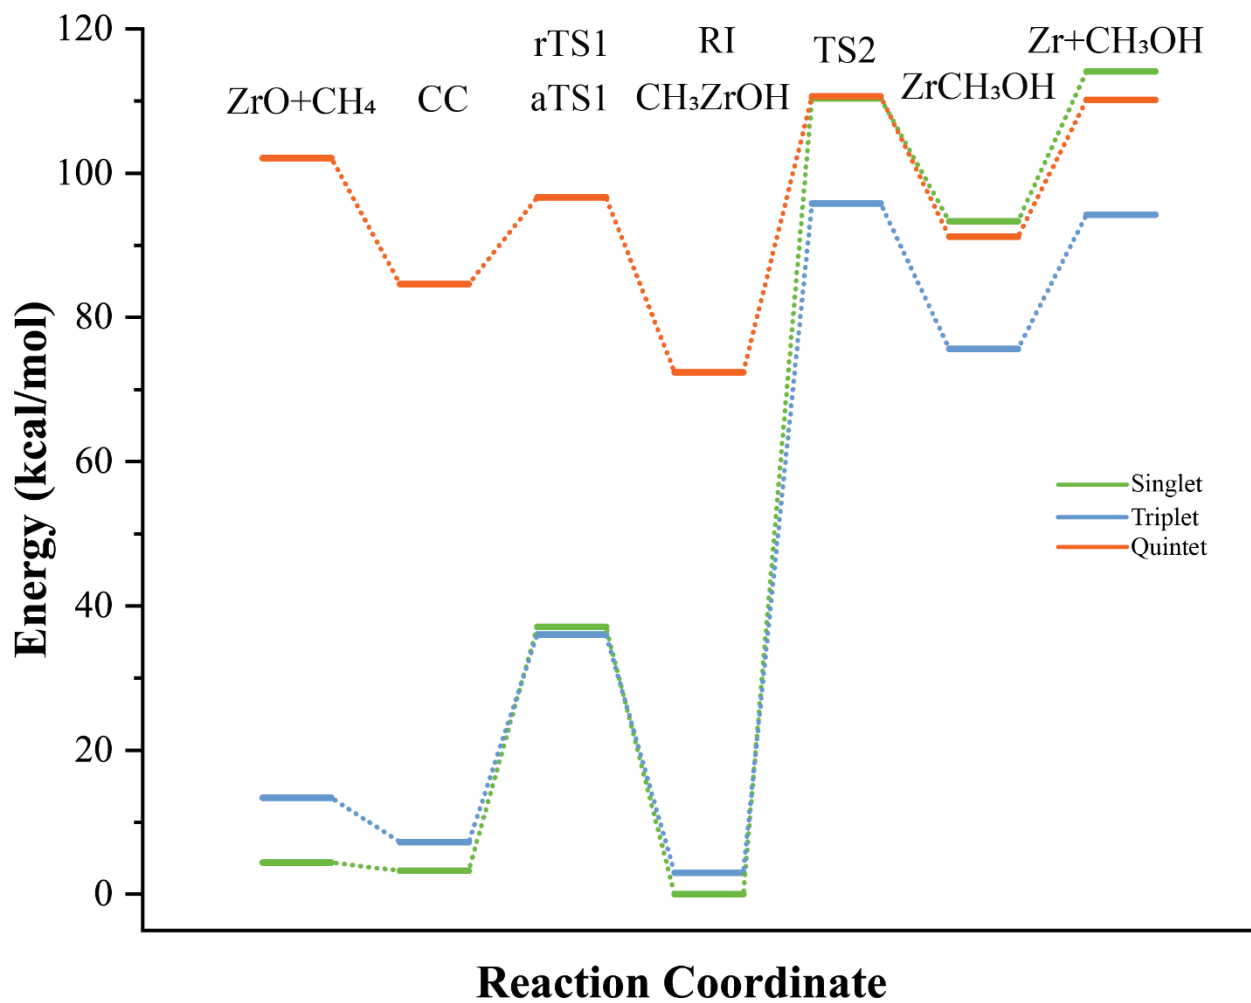

**Figure S2.** MN15/TZ. Full reaction pathway. The zero for all spins is relative to the lowest energy state along the overall reaction pathway.

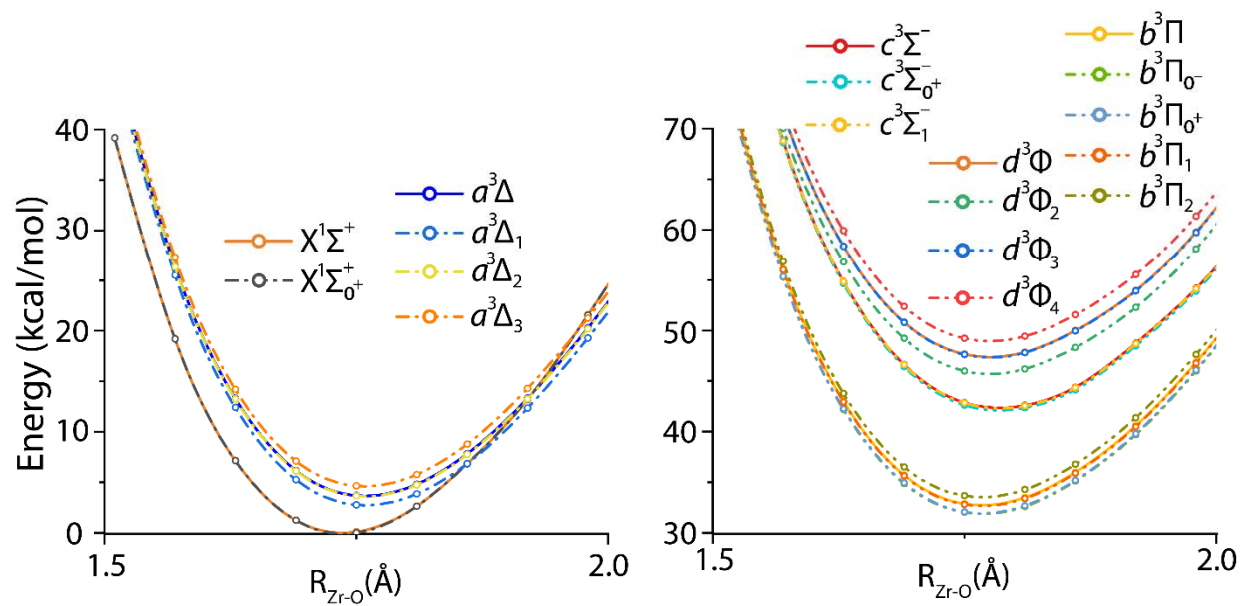

**Figure S3.** MRCI/TZ. Comparison of spin-orbit effects on plotted potential energy curves. Shown in solid lines are MRCI energies. Dashed/dotted lines show spin-orbit splitting for the low lying states of ZrO.

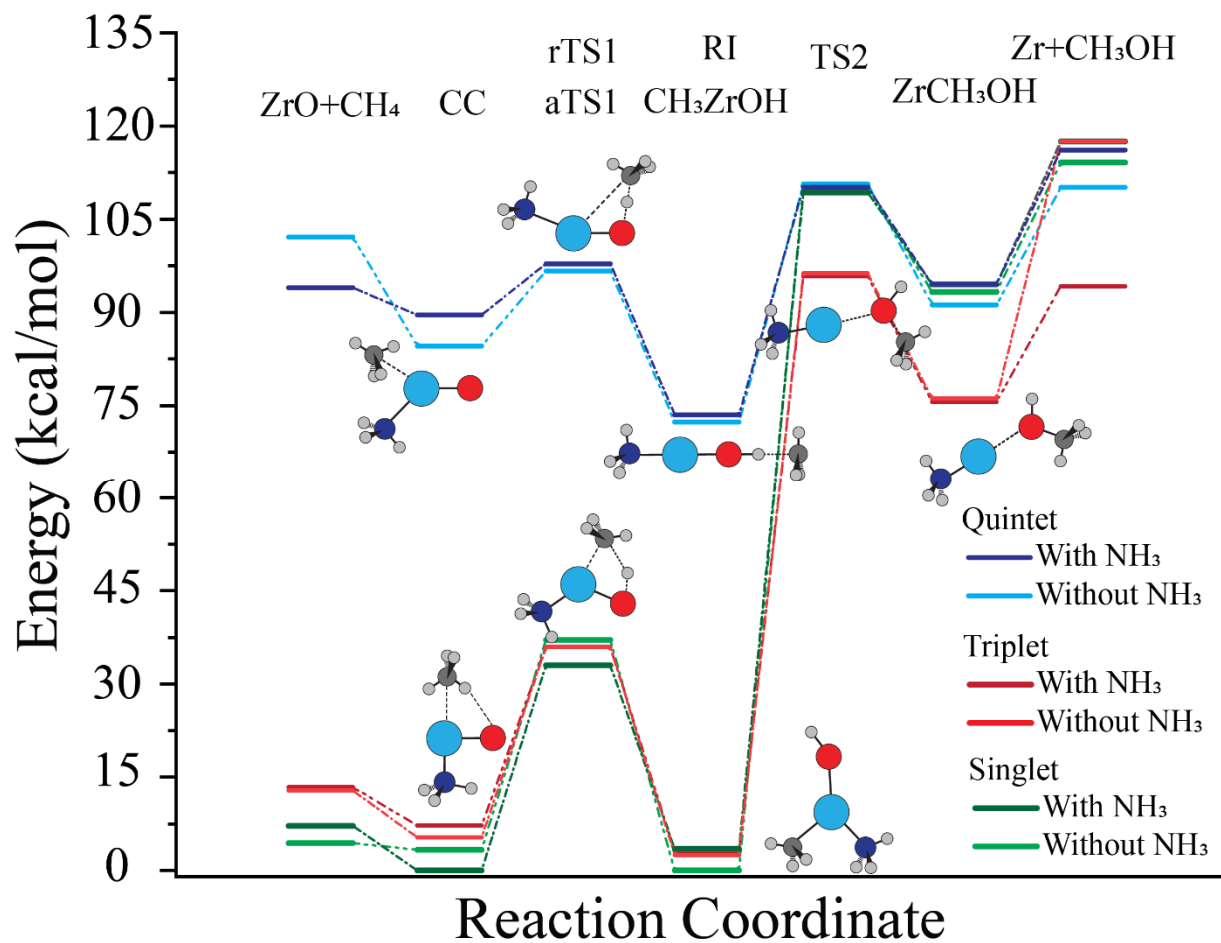

**Figure S4.** MN15/TZ. Reaction pathway for the conversion of methane to methanol catalyzed by ZrO with and without the addition of an NH<sub>3</sub> ligand for various ZrO spin multiplicities. Structures are shown for the triplet [2+2] reaction mechanism and the radical quintet.

**Table S1.** Spectroscopic constants for the low-lying triplet electronic states with and without Spin-Orbit. Equilibrium energy  $E_e$  (a.u.), bond length  $r_e$  (Å), harmonic vibrational frequency  $\omega_e$  ( $\text{cm}^{-1}$ ), anharmonicity  $\omega_e x_e$  ( $\text{cm}^{-1}$ ) and  $\Delta G_{1/2} = E_{v=1} - E_{v=0}$  ( $\text{cm}^{-1}$ ) for the  ${}^3\Delta$  and  ${}^3\Pi$  states for  ${}^{90}\text{Zr}^{16}\text{O}$ . Energies calculated at the MRCI/TZ level.

| State          | $-E_e$    | $r_e$ | $\omega_e$ | $\omega_e x_e$ | $\Delta G_{1/2}$ |
|----------------|-----------|-------|------------|----------------|------------------|
| $a^3\Delta$    | 121.60171 | 1.759 | 910        | 3.40           | 902              |
| $a^3\Delta_1$  | 121.60320 | 1.759 | 909        | 3.38           | 901              |
| $a^3\Delta_2$  | 121.60182 | 1.759 | 910        | 3.44           | 902              |
| $a^3\Delta_3$  | 121.60022 | 1.759 | 910        | 3.41           | 902              |
| $b^3\Pi$       | 121.55540 | 1.768 | 866        | 3.21           | 864              |
| $b^3\Pi_{0^-}$ | 121.55678 | 1.768 | 867        | 3.18           | 865              |
| $b^3\Pi_{0^+}$ | 121.55666 | 1.768 | 869        | 3.44           | 868              |
| $b^3\Pi_1$     | 121.55550 | 1.768 | 866        | 3.19           | 864              |
| $b^3\Pi_2$     | 121.55418 | 1.768 | 866        | 3.24           | 863              |

**Table S2.** MRCI/5Z Spin-Orbit splitting for the lowest electronic states at  $r(\text{Zr-O})$  1.75 Å and excitation energy  $T_e$  ( $\text{cm}^{-1}$ ). Only the states labeled in <sup>a</sup> and <sup>b</sup> showed considerable second order coupling effects.

| State         | $\Omega$       | $T_e$  | State         | $\Omega$       | $T_e$               | State         | $\Omega$       | $T_e$  |
|---------------|----------------|--------|---------------|----------------|---------------------|---------------|----------------|--------|
| $X^1\Sigma^+$ | 0 <sup>-</sup> | 0      | $B^1\Pi$      | 1              | 15,579              | $D^1\Gamma$   | 4              | 19,094 |
| $a^3\Delta$   | 1              | 966    | $d^3\Phi$     | 2              | 16,087              | $f^3\Delta$   | 1              | 22,368 |
|               | 2              | 1,269  |               | 3              | 16,653              |               | 2              | 22,667 |
|               | 3              | 1,622  |               | 4              | 17,214              |               | 3              | 22,942 |
| $A^1\Delta$   | 2              | 5,781  | $C^1\Sigma^+$ | 0 <sup>+</sup> | 18,579              | $E^1\Phi$     | 3              | 23,871 |
| $b^3\Pi$      | 0 <sup>-</sup> | 11,204 | $e^3\Pi$      | 0 <sup>-</sup> | 19,024 <sup>a</sup> | $F^1\Delta$   | 2              | 25,465 |
|               | 0 <sup>+</sup> | 11,219 |               | 0 <sup>+</sup> | 19,086              | $2^1\Pi$      | 1              | 27,390 |
|               | 1              | 11,473 |               | 1              | 19,226 <sup>b</sup> | $3^1\Sigma^+$ | 0 <sup>+</sup> | 28,472 |
|               | 2              | 11,776 |               | 2              | 19,244              |               |                |        |
| $C^3\Sigma^-$ | 0 <sup>+</sup> | 14,904 | $I^3\Sigma^+$ | 1              | 19,072 <sup>b</sup> |               |                |        |
|               | 1              | 14,983 |               | 0 <sup>-</sup> | 19,167 <sup>a</sup> |               |                |        |

**Table S3.** Cartesian coordinates of the MN15/TZ optimal structures without symmetry restrictions.

|    | Singlet            |           |           | Triplet            |           |           | Quintet                   |           |           |
|----|--------------------|-----------|-----------|--------------------|-----------|-----------|---------------------------|-----------|-----------|
|    | ZrO                |           |           | ZrO                |           |           | ZrO                       |           |           |
| Zr | 0.000000           | 0.000000  | 0.283611  | 0.000000           | 0.000000  | 0.286889  | 0.000000                  | 0.000000  | 0.317828  |
| O  | 0.000000           | 0.000000  | -1.418053 | 0.000000           | 0.000000  | -1.434444 | 0.000000                  | 0.000000  | -1.589141 |
|    | CC                 |           |           | CC                 |           |           | CC                        |           |           |
| C  | 3.606386           | -0.009322 | -0.000111 | -2.358773          | 0.193754  | 0.000076  | -2.35523                  | 0.000688  | -0.001714 |
| H  | 3.246892           | 0.123959  | 1.018641  | -2.959541          | 0.333756  | 0.894627  | -2.002205                 | -0.78249  | -0.697649 |
| H  | 3.249405           | 0.8083    | -0.623756 | -1.998064          | -0.842776 | -0.000219 | -2.002325                 | 0.996     | -0.328947 |
| H  | 3.242582           | -0.956124 | -0.395135 | -1.564895          | 0.952926  | -0.000046 | -2.004057                 | -0.212996 | 1.024605  |
| H  | 4.693793           | -0.013457 | -0.000205 | -2.960013          | 0.334038  | -0.894117 | -3.439613                 | 0.00069   | -0.002752 |
| Zr | -0.467703          | 0.007908  | 0.000095  | 0.409741           | -0.316738 | -0.000021 | 0.155844                  | -0.000303 | 0.00085   |
| O  | -2.170357          | -0.027885 | -0.000335 | 0.905688           | 1.341133  | 0.000019  | 2.168225                  | 0.00085   | -0.00237  |
|    | aTS1               |           |           | aTS1               |           |           | rTS1                      |           |           |
| C  | -1.846373          | -0.139583 | 0.000001  | -1.917699          | -0.190402 | 0.000007  | 2.780425                  | -0.388258 | -0.000003 |
| H  | -1.941222          | -0.775364 | 0.893874  | -2.498366          | 0.062252  | 0.888513  | 1.861056                  | 0.393235  | 0.000009  |
| H  | -1.941033          | -0.776    | -0.893434 | -1.840657          | -1.290662 | -0.000306 | 3.334366                  | -0.171631 | -0.907015 |
| H  | -0.945884          | 1.02234   | -0.000029 | -0.981318          | 0.966239  | -0.000015 | 3.334314                  | -0.171704 | 0.907056  |
| H  | -2.671985          | 0.568638  | -0.000381 | -2.498565          | 0.062701  | -0.888241 | 2.344034                  | -1.382986 | -0.000033 |
| Zr | 0.420334           | -0.281331 | -0.000001 | 0.456422           | -0.269844 | 0         | -0.831258                 | -0.12192  | 0         |
| O  | 0.220626           | 1.506388  | 0.000001  | 0.133526           | 1.516957  | 0.000001  | 0.711752                  | 1.06743   | 0.000002  |
|    | [2+2] Intermediate |           |           | [2+2] Intermediate |           |           | Radical Intermediate (RI) |           |           |
| C  | 1.879427           | 0.579393  | -0.000027 | -1.955006          | 0.602277  | -0.000008 | -1.749166                 | 0.003035  | -0.003831 |
| H  | 2.076573           | -0.06875  | -0.898189 | -2.515013          | 0.2672    | 0.885658  | -4.029399                 | -0.001109 | 0.001162  |
| H  | 2.076569           | -0.068715 | 0.898162  | -2.515161          | 0.267184  | -0.885568 | -4.062315                 | 1.032164  | -0.296746 |
| H  | -2.38222           | 1.252378  | 0.000204  | 2.297486           | 1.435058  | -0.000001 | -4.053186                 | -0.77621  | -0.74461  |
| H  | 2.562547           | 1.418426  | -0.000039 | -1.964973          | 1.695094  | -0.000009 | -4.046193                 | -0.259837 | 1.045343  |
| Zr | -0.035224          | -0.252419 | -0.000017 | 0.070576           | -0.31932  | -0.000001 | 1.109376                  | -0.000265 | 0.000289  |
| O  | -1.775135          | 0.510884  | 0.000087  | 1.700582           | 0.686823  | 0         | -0.785974                 | 0.002263  | -0.002337 |
|    | TS2                |           |           | TS2                |           |           | TS2                       |           |           |
| C  | -2.053548          | -0.568439 | 0.016392  | 2.077059           | -0.590028 | -0.013407 | 1.724548                  | -0.713785 | -0.009664 |
| H  | -1.915616          | -1.090651 | 0.955084  | 1.765062           | -1.290881 | -0.775173 | 0.969527                  | -1.513164 | -0.2043   |
| H  | -1.8499            | -1.172059 | -0.859134 | 2.069731           | -0.968534 | 0.997045  | 2.191948                  | -0.835143 | 0.956787  |
| H  | -2.974456          | -0.006017 | -0.052217 | 2.941595           | 0.001885  | -0.274688 | 2.42372                   | -0.651921 | -0.834306 |
| H  | -1.276191          | 1.44504   | 0.644416  | 1.251215           | 1.502894  | -0.632744 | 1.541512                  | 1.49105   | -0.60551  |
| Zr | 0.71947            | -0.069974 | 0.003936  | -0.717246          | -0.076742 | -0.004108 | -0.680419                 | -0.038342 | -0.003275 |
| O  | -1.05517           | 0.879162  | -0.117994 | 1.024987           | 0.920562  | 0.116289  | 1.217847                  | 0.915698  | 0.109541  |
|    | Zr---OHCH3         |           |           | Zr---OHCH3         |           |           | Zr---OHCH3                |           |           |
| C  | -2.481019          | -0.329331 | 0.000118  | 2.466078           | -0.328316 | 0.000066  | -2.427353                 | -0.364842 | -0.000015 |
| H  | -3.068429          | -0.136727 | 0.896272  | 3.049697           | -0.127894 | -0.895479 | -3.030221                 | -0.221014 | 0.894957  |

|    |           |           |           |           |           |           |           |           |           |
|----|-----------|-----------|-----------|-----------|-----------|-----------|-----------|-----------|-----------|
| H  | -2.141039 | -1.36099  | -0.002274 | 2.131357  | -1.36121  | -0.000351 | -2.001423 | -1.366095 | -0.000289 |
| H  | -3.070894 | -0.133344 | -0.893682 | 3.04885   | -0.128387 | 0.896269  | -3.030479 | -0.220639 | -0.894752 |
| H  | -1.520251 | 1.421885  | 0.000798  | 1.478954  | 1.430533  | 0.000886  | -1.584512 | 1.457458  | -0.00016  |
| Zr | 0.876593  | -0.041971 | -0.000048 | -0.868068 | -0.042772 | 0.000012  | 0.867345  | -0.043041 | 0.000005  |
| O  | -1.297126 | 0.483003  | 0.000012  | 1.277175  | 0.483466  | -0.000273 | -1.310381 | 0.532621  | 0.000016  |



**Table S4.** Harmonic vibrational frequencies ( $\text{cm}^{-1}$ ) of the optimal structures for the coordination complex (CC), first transition state of the [2+2] mechanism (aTS1) and radical mechanism (rTS1), intermediate (I), second transition state (TS2), and the Zr---OHCH<sub>3</sub> intermediate (I2),  $\text{ZrO} + \text{CH}_4 \rightarrow \text{Zr} + \text{CH}_3\text{OH}$  reaction for the lowest singlet, triplet, and quartet states at the MN15/TZ.

| Singlet |       |      |      |      | Triplet |       |      |      |      | Quintet |       |      |      |      |
|---------|-------|------|------|------|---------|-------|------|------|------|---------|-------|------|------|------|
| CC      | aTS1  | I    | TS2  | I2   | CC      | aTS1  | I    | TS2  | I2   | CC      | rTS1  | I    | TS2  | I2   |
| -51     | -1614 | 116  | -741 | 92   | 70      | -1590 | 96   | -967 | 88   | 59      | -1051 | 13   | -956 | 94   |
| 40      | 184   | 175  | 136  | 186  | 128     | 116   | 144  | 95   | 167  | 72      | 46    | 16   | 140  | 124  |
| 41      | 264   | 352  | 186  | 327  | 143     | 300   | 300  | 205  | 323  | 228     | 71    | 95   | 290  | 310  |
| 62      | 310   | 418  | 362  | 382  | 177     | 480   | 309  | 387  | 325  | 465     | 321   | 96   | 390  | 313  |
| 119     | 526   | 453  | 550  | 1033 | 456     | 517   | 339  | 545  | 1029 | 468     | 358   | 97   | 446  | 1040 |
| 1033    | 710   | 494  | 665  | 1047 | 963     | 687   | 345  | 679  | 1052 | 600     | 647   | 426  | 735  | 1052 |
| 1320    | 930   | 658  | 769  | 1158 | 1220    | 904   | 491  | 710  | 1160 | 1302    | 773   | 426  | 879  | 1164 |
| 1321    | 1143  | 717  | 921  | 1304 | 1347    | 1057  | 697  | 860  | 1307 | 1304    | 1145  | 604  | 929  | 1308 |
| 1328    | 1194  | 1121 | 1197 | 1447 | 1390    | 1226  | 1136 | 1128 | 1450 | 1368    | 1227  | 720  | 1236 | 1448 |
| 1544    | 1405  | 1385 | 1420 | 1482 | 1495    | 1421  | 1402 | 1409 | 1485 | 1536    | 1263  | 1393 | 1359 | 1477 |
| 1545    | 1408  | 1417 | 1423 | 1485 | 1581    | 1450  | 1402 | 1423 | 1486 | 1537    | 1424  | 1393 | 1414 | 1489 |
| 3056    | 1979  | 2741 | 3116 | 3078 | 2977    | 1987  | 2974 | 3141 | 3090 | 2871    | 1432  | 3159 | 2754 | 3074 |
| 3162    | 2967  | 2802 | 3247 | 3163 | 3077    | 2966  | 3033 | 3271 | 3179 | 2983    | 3090  | 3336 | 3165 | 3162 |
| 3179    | 3031  | 3227 | 3250 | 3184 | 3142    | 3082  | 3102 | 3297 | 3195 | 2983    | 3211  | 3337 | 3255 | 3168 |
| 3183    | 3164  | 3966 | 3698 | 3822 | 3194    | 3131  | 3985 | 3676 | 3772 | 3205    | 3228  | 3846 | 3663 | 3836 |
| ZrO     |       |      |      |      | ZrO     |       |      |      |      | ZrO     |       |      |      |      |
| 1035    |       |      |      |      | 983     |       |      |      |      | 660     |       |      |      |      |

**Table S5.** Harmonic vibrational frequencies ( $\text{cm}^{-1}$ ) of the optimal structures for the coordination complex (CC), first transition state of the radical mechanism (rTS1), radical intermediate (I), second transition state (TS2), and the  $(\text{F}_3/\text{H}_3)\text{Zr}\text{---OHCH}_3$  intermediate (I2), for the  $(\text{F}_3/\text{H}_3)\text{ZrO} + \text{CH}_4 \rightarrow (\text{F}_3/\text{H}_3)\text{Zr} + \text{CH}_3\text{OH}$  reaction for the lowest doublet state at the MN15/TZ.

| $\text{H}_3\text{ZrO} + \text{CH}_4$ |       |      |      |      | $\text{F}_3\text{ZrO} + \text{CH}_4$ |       |      |      |      |                        |                       |
|--------------------------------------|-------|------|------|------|--------------------------------------|-------|------|------|------|------------------------|-----------------------|
| CC                                   | rTS1  | I    | TS2  | I2   | CC                                   | rTS1  | I    | TS2  | I2   |                        |                       |
| 91                                   | -1039 | -14  | -979 | 90   | 90                                   | -1235 | -1   | -856 | 45   |                        |                       |
| 106                                  | 5     | 39   | 182  | 102  | 99                                   | 44    | 22   | 31   | 85   | $\text{H}_3\text{ZrO}$ | $\text{H}_3\text{Zr}$ |
| 117                                  | 92    | 40   | 215  | 136  | 109                                  | 64    | 29   | 94   | 110  | 77                     | 164                   |
| 159                                  | 137   | 112  | 249  | 149  | 119                                  | 84    | 105  | 121  | 117  | 329                    | 649                   |
| 184                                  | 327   | 129  | 305  | 280  | 149                                  | 145   | 114  | 138  | 127  | 505                    | 649                   |
| 319                                  | 356   | 130  | 334  | 341  | 153                                  | 154   | 119  | 149  | 167  | 532                    | 1655                  |
| 393                                  | 367   | 397  | 472  | 477  | 163                                  | 158   | 154  | 170  | 201  | 577                    | 1655                  |
| 420                                  | 433   | 398  | 501  | 577  | 166                                  | 168   | 156  | 179  | 241  | 604                    | 1694                  |
| 512                                  | 504   | 492  | 530  | 597  | 176                                  | 175   | 175  | 243  | 331  | 1672                   |                       |
| 535                                  | 569   | 492  | 590  | 600  | 181                                  | 363   | 181  | 317  | 443  | 1688                   |                       |
| 563                                  | 597   | 518  | 606  | 1032 | 196                                  | 417   | 182  | 486  | 593  | 1746                   |                       |
| 609                                  | 698   | 587  | 725  | 1077 | 640                                  | 647   | 464  | 608  | 620  |                        |                       |
| 1253                                 | 790   | 588  | 821  | 1171 | 659                                  | 661   | 465  | 649  | 647  | $\text{F}_3\text{ZrO}$ | $\text{F}_3\text{Zr}$ |
| 1331                                 | 1107  | 639  | 967  | 1287 | 668                                  | 671   | 635  | 661  | 1065 | 48                     | 75                    |
| 1365                                 | 1260  | 789  | 1235 | 1462 | 680                                  | 681   | 657  | 749  | 1095 | 146                    | 150                   |
| 1512                                 | 1288  | 1393 | 1373 | 1483 | 1319                                 | 741   | 664  | 755  | 1176 | 158                    | 152                   |
| 1546                                 | 1415  | 1393 | 1432 | 1494 | 1326                                 | 1133  | 666  | 862  | 1326 | 161                    | 640                   |
| 1612                                 | 1421  | 1668 | 1607 | 1529 | 1329                                 | 1253  | 757  | 1070 | 1466 | 167                    | 675                   |
| 1685                                 | 1664  | 1669 | 1620 | 1585 | 1545                                 | 1295  | 1393 | 1419 | 1495 | 649                    | 677                   |
| 1729                                 | 1672  | 1725 | 1666 | 1630 | 1549                                 | 1419  | 1393 | 1433 | 1496 | 660                    |                       |
| 2989                                 | 1723  | 3156 | 2985 | 3087 | 3037                                 | 1430  | 3157 | 3150 | 3090 | 671                    |                       |
| 3079                                 | 3090  | 3334 | 3184 | 3176 | 3139                                 | 3092  | 3334 | 3302 | 3168 | 683                    |                       |
| 3156                                 | 3210  | 3335 | 3269 | 3185 | 3160                                 | 3212  | 3335 | 3317 | 3211 |                        |                       |
| 3213                                 | 3240  | 3762 | 3697 | 3811 | 3177                                 | 3241  | 3792 | 3898 | 3852 |                        |                       |

**Table S6.** Electronic energies (a.u.) of the MN15/TZ optimal structures without symmetry restrictions for the  $(F_3/H_3)ZrO + CH_4 \rightarrow Zr(F_3/H_3) + CH_3OH$  and  $ZrO + CH_4 \rightarrow Zr + CH_3OH$  reactions.

| Structure                             | Singlet        | Triplet                               | Structure              | Quintet    |
|---------------------------------------|----------------|---------------------------------------|------------------------|------------|
| CC                                    | -162.45735     | -162.44272                            | CC                     | -162.32768 |
| aTS1                                  | -162.40341     | -162.40508                            | rTS1                   | -162.30846 |
| CH <sub>3</sub> ZrOH                  | -162.46253     | -162.45778                            | RI                     | -162.34720 |
| TS2                                   | -162.28664     | -162.30981                            | TS2                    | -162.28612 |
| Zr---OHCH <sub>3</sub>                | -162.31385     | -162.34203                            | Zr---OHCH <sub>3</sub> | -162.31722 |
| Zr                                    | -46.64228      | -46.67398                             | Zr                     | -46.64859  |
| ZrO                                   | -121.98693     | -121.97264                            | ZrO                    | -121.84463 |
| Structure                             | H <sub>3</sub> | Structure                             | F <sub>3</sub>         |            |
| H <sub>3</sub> Zr CC                  | -164.17695     | F <sub>3</sub> Zr CC                  | -462.13092             |            |
| H <sub>3</sub> Zr rTS1                | -164.16770     | F <sub>3</sub> Zr rTS1                | -462.12149             |            |
| H <sub>3</sub> Zr RI                  | -164.20678     | F <sub>3</sub> Zr RI                  | -462.16048             |            |
| H <sub>3</sub> Zr TS2                 | -164.14534     | F <sub>3</sub> Zr TS2                 | -462.10434             |            |
| H <sub>3</sub> Zr---OHCH <sub>3</sub> | -164.18308     | F <sub>3</sub> Zr---OHCH <sub>3</sub> | -462.14193             |            |
| H <sub>3</sub> Zr                     | -48.50013      | F <sub>3</sub> Zr                     | -346.46793             |            |
| H <sub>3</sub> ZrO                    | -123.69967     | F <sub>3</sub> ZrO                    | -421.65405             |            |

**Table S7.** Cartesian coordinates of the MN15/TZ optimal structures without symmetry restrictions for the  $(F_3/H_3)ZrO + CH_4 \rightarrow (F_3/H_3)Zr + CH_3OH$  reaction.

| H <sub>3</sub> Zr    |           |           |           | F <sub>3</sub> Zr    |           |           |           |
|----------------------|-----------|-----------|-----------|----------------------|-----------|-----------|-----------|
| Zr                   | -0.000001 | 0         | -0.015643 | Zr                   | 0.000635  | -0.000026 | 0.000533  |
| H                    | 1.756298  | -0.549921 | 0.208565  | F                    | -1.137552 | -1.527991 | -0.000789 |
| H                    | -0.401871 | 1.795917  | 0.208569  | F                    | -0.75826  | 1.746671  | -0.000789 |
| H                    | -1.354382 | -1.245995 | 0.208571  | F                    | 1.89299   | -0.218563 | -0.000791 |
| H <sub>3</sub> ZrO   |           |           |           | F <sub>3</sub> ZrO   |           |           |           |
| Zr                   | 0.267192  | 0.000772  | -0.005163 | Zr                   | -0.005143 | 0.003836  | 0.001648  |
| O                    | -1.675783 | 0.006823  | -0.023239 | O                    | -0.572959 | 0.669041  | 1.79229   |
| H                    | 0.657292  | -0.114519 | 1.786608  | F                    | -1.565462 | -0.150427 | -1.063411 |
| H                    | 1.072623  | 1.545396  | -0.623177 | F                    | 0.845912  | -1.682599 | 0.196283  |
| H                    | 0.988661  | -1.516325 | -0.770998 | F                    | 1.251703  | 1.221273  | -0.73334  |
| H <sub>3</sub> Zr CC |           |           |           | F <sub>3</sub> Zr CC |           |           |           |
| Zr                   | 0.574683  | -0.189126 | -0.000578 | Zr                   | -0.317865 | 0.006206  | -0.000212 |
| O                    | -0.18389  | 1.593134  | -0.036917 | O                    | 0.3549    | -1.870512 | 0.131421  |
| H                    | 2.381644  | -0.028169 | -0.37383  | F                    | -2.194913 | -0.231601 | 0.018414  |
| H                    | -0.043466 | -1.571555 | -1.082664 | F                    | 0.141874  | 0.8539    | -1.64449  |
| H                    | 0.455937  | -0.697086 | 1.769315  | F                    | 0.144249  | 1.081427  | 1.504702  |
| C                    | -2.429777 | -0.285659 | 0.002579  | C                    | 2.696948  | -0.060961 | 0.004864  |
| H                    | -2.883447 | 0.611678  | 0.410174  | H                    | 2.338371  | -0.506358 | 0.934283  |

|                                           |           |           |           |                                           |           |           |           |
|-------------------------------------------|-----------|-----------|-----------|-------------------------------------------|-----------|-----------|-----------|
| H                                         | -1.854724 | -0.022456 | -0.894182 | H                                         | 2.340986  | -0.613231 | -0.866308 |
| H                                         | -3.182478 | -1.006771 | -0.303408 | H                                         | 3.782336  | -0.12082  | 0.010076  |
| H                                         | -1.811002 | -0.75171  | 0.777573  | H                                         | 2.411111  | 0.988493  | -0.057749 |
| <b>H<sub>3</sub>Zr rTS1</b>               |           |           |           | <b>F<sub>3</sub>Zr rTS1</b>               |           |           |           |
| C                                         | -2.589261 | -0.384838 | -0.000139 | C                                         | 2.856062  | -0.045875 | 0.031774  |
| H                                         | -2.053126 | -1.330604 | 0.018062  | H                                         | 2.458591  | 0.965595  | -0.002831 |
| H                                         | -3.142992 | -0.23655  | -0.920402 | H                                         | 3.077944  | -0.450536 | -0.948647 |
| H                                         | -1.780902 | 0.522727  | -0.000632 | H                                         | 1.996221  | -0.786658 | 0.497807  |
| H                                         | -3.163898 | -0.214019 | 0.903339  | H                                         | 3.66329   | -0.145393 | 0.749538  |
| Zr                                        | 0.694678  | -0.117832 | -0.000012 | Zr                                        | -0.383739 | -0.005318 | 0.001837  |
| O                                         | -0.653527 | 1.251775  | -0.000012 | O                                         | 0.826307  | -1.298988 | 0.826678  |
| H                                         | 2.401606  | 0.606294  | -0.005473 | F                                         | -2.17938  | -0.602734 | 0.219453  |
| H                                         | 0.361388  | -1.166283 | 1.493806  | F                                         | -0.102547 | 1.697501  | 0.81932   |
| H                                         | 0.354584  | -1.173442 | -1.48728  | F                                         | 0.104893  | 0.160443  | -1.835818 |
| <b>H<sub>3</sub>Zr RI</b>                 |           |           |           | <b>F<sub>3</sub>Zr RI</b>                 |           |           |           |
| Zr                                        | -1.012547 | 0.00026   | -0.000208 | Zr                                        | 0.548883  | 0.000151  | 0.001287  |
| H                                         | 1.829772  | -0.006006 | 0.001576  | H                                         | -2.315308 | 0.015309  | 0.0498    |
| C                                         | 4.031362  | 0.00125   | -0.000805 | C                                         | -4.5329   | 0.001276  | -0.002805 |
| H                                         | 4.080142  | -0.274744 | 1.038229  | H                                         | -4.600648 | 0.82223   | 0.68973   |
| H                                         | 4.077885  | -0.76005  | -0.7601   | H                                         | -4.548928 | 0.191066  | -1.06204  |
| H                                         | 4.06199   | 1.039815  | -0.281232 | H                                         | -4.57526  | -1.010651 | 0.360699  |
| O                                         | 0.86193   | -0.002342 | 0.002155  | O                                         | -1.349545 | 0.012122  | 0.047219  |
| H                                         | -1.540924 | 1.738174  | -0.383084 | F                                         | 1.190074  | -1.671947 | 0.663731  |
| H                                         | -1.546354 | -0.536969 | 1.694195  | F                                         | 1.226872  | 1.419764  | 1.082158  |
| H                                         | -1.544256 | -1.199392 | -1.31368  | F                                         | 1.14734   | 0.237891  | -1.795953 |
| <b>H<sub>3</sub>Zr TS2</b>                |           |           |           | <b>F<sub>3</sub>Zr TS2</b>                |           |           |           |
| Zr                                        | -0.624066 | 0.042357  | 0.004361  | Zr                                        | -0.468824 | -0.00005  | -0.011147 |
| O                                         | 1.191153  | -0.966415 | -0.127862 | O                                         | 1.397938  | -0.000942 | -0.884457 |
| C                                         | 1.85926   | 0.674167  | -0.03741  | C                                         | 3.061184  | -0.000134 | -0.093695 |
| H                                         | 1.283466  | 1.343873  | 0.616867  | H                                         | 3.489888  | -0.917901 | -0.464876 |
| H                                         | 1.989473  | 1.047837  | -1.042857 | H                                         | 2.764841  | 0.002836  | 0.9426    |
| H                                         | 2.77386   | 0.350184  | 0.44173   | H                                         | 3.491207  | 0.915028  | -0.469762 |
| H                                         | 1.495839  | -1.56273  | 0.578158  | H                                         | 1.570935  | -0.002476 | -1.831613 |
| H                                         | -1.809562 | -0.963459 | -1.034205 | F                                         | -1.477633 | -1.602752 | -0.278928 |
| H                                         | -0.803149 | 1.870285  | -0.349379 | F                                         | -1.478489 | 1.601467  | -0.28272  |
| H                                         | -0.652086 | -0.09396  | 1.862611  | F                                         | 0.498953  | 0.002712  | 1.662467  |
| <b>H<sub>3</sub>Zr---OHCH<sub>3</sub></b> |           |           |           | <b>F<sub>3</sub>Zr---OHCH<sub>3</sub></b> |           |           |           |
| Zr                                        | -0.817344 | 0.034919  | 0.000004  | Zr                                        | -0.524238 | -0.027585 | 0.039483  |
| O                                         | 1.342807  | -0.433711 | -0.00024  | O                                         | 1.693461  | 0.52858   | -0.113174 |
| C                                         | 2.550513  | 0.332695  | 0.000072  | C                                         | 2.894313  | -0.218213 | -0.321119 |
| H                                         | 3.131332  | 0.117848  | 0.894342  | H                                         | 3.267861  | -0.060959 | -1.331221 |
| H                                         | 2.250123  | 1.377134  | 0.000214  | H                                         | 2.634223  | -1.26165  | -0.178682 |

|   |           |           |           |   |           |           |           |
|---|-----------|-----------|-----------|---|-----------|-----------|-----------|
| H | 3.131607  | 0.118109  | -0.89408  | H | 3.645814  | 0.074866  | 0.408819  |
| H | 1.473372  | -1.392341 | 0.000425  | H | 1.820197  | 1.485573  | -0.135179 |
| H | -1.342016 | 0.847937  | -1.616192 | F | -2.303945 | -0.427839 | -0.537867 |
| H | -0.653453 | -1.843407 | 0.002424  | F | -0.409653 | 1.897381  | 0.319521  |
| H | -1.342747 | 0.851461  | 1.614181  | F | 0.345582  | -1.69774  | 0.494909  |

---

**Table S8.** Harmonic vibrational frequencies ( $\text{cm}^{-1}$ ) of the optimal structures for the coordination complex (CC), first transition state of the [2+2] mechanism (TS1a) and radical mechanism (TS1r), intermediate (I), second transition state (TS2), and the  $\text{ZrNH}_3\text{---OHCH}_3$  intermediate (I2),  $\text{NH}_3\text{ZrO} + \text{CH}_4 \rightarrow \text{NH}_3\text{Zr} + \text{CH}_3\text{OH}$  reaction for the lowest singlet, triplet, and quintet states at MN15/TZ

| Singlet                                  |      |       |      |      |      | Triplet                                  |      |       |      |       |      | Quintet                                  |      |       |      |      |      |
|------------------------------------------|------|-------|------|------|------|------------------------------------------|------|-------|------|-------|------|------------------------------------------|------|-------|------|------|------|
| $\text{NH}_3\text{ZrO}$                  | CC   | aTS1  | I    | TS2  | I2   | $\text{NH}_3\text{ZrO}$                  | CC   | aTS1  | I    | TS2   | I2   | $\text{NH}_3\text{ZrO}$                  | CC   | rTS1  | I    | TS2  | I2   |
| 90                                       | 77   | -1530 | 55   | -748 | 35   | 129                                      | 57   | -1516 | 55   | -1133 | 34   | 33                                       | 37   | -1202 | -18  | -839 | 29   |
| 127                                      | 96   | 34    | 68   | 49   | 46   | 139                                      | 80   | 57    | 68   | 61    | 64   | 72                                       | 54   | 35    | 4    | 38   | 51   |
| 357                                      | 96   | 62    | 92   | 72   | 68   | 325                                      | 125  | 82    | 92   | 71    | 80   | 300                                      | 84   | 37    | 6    | 73   | 80   |
| 425                                      | 123  | 82    | 101  | 84   | 103  | 471                                      | 127  | 124   | 101  | 79    | 107  | 358                                      | 127  | 45    | 20   | 105  | 96   |
| 546                                      | 170  | 183   | 118  | 178  | 124  | 488                                      | 160  | 140   | 118  | 110   | 154  | 383                                      | 159  | 72    | 26   | 146  | 151  |
| 989                                      | 228  | 248   | 251  | 206  | 279  | 940                                      | 168  | 274   | 251  | 200   | 294  | 584                                      | 171  | 92    | 84   | 283  | 262  |
| 1166                                     | 301  | 269   | 252  | 252  | 328  | 1151                                     | 194  | 313   | 252  | 282   | 308  | 1134                                     | 230  | 298   | 100  | 310  | 296  |
| 1583                                     | 370  | 331   | 281  | 351  | 353  | 1614                                     | 332  | 439   | 281  | 340   | 323  | 1595                                     | 294  | 336   | 115  | 357  | 315  |
| 1588                                     | 433  | 418   | 312  | 361  | 374  | 1614                                     | 468  | 449   | 312  | 373   | 365  | 1596                                     | 353  | 343   | 295  | 362  | 336  |
| 3399                                     | 517  | 461   | 363  | 434  | 390  | 3459                                     | 473  | 505   | 363  | 406   | 423  | 3438                                     | 435  | 364   | 338  | 412  | 405  |
| 3516                                     | 537  | 529   | 412  | 545  | 1038 | 3577                                     | 484  | 507   | 412  | 524   | 1045 | 3565                                     | 464  | 380   | 339  | 485  | 1028 |
| 3573                                     | 957  | 654   | 477  | 675  | 1062 | 3591                                     | 924  | 647   | 477  | 681   | 1054 | 3569                                     | 584  | 578   | 472  | 746  | 1059 |
|                                          | 1138 | 903   | 519  | 791  | 1100 |                                          | 1140 | 880   | 519  | 714   | 1107 |                                          | 1137 | 747   | 474  | 906  | 1094 |
| <b><math>\text{NH}_3\text{Zr}</math></b> | 1293 | 1123  | 708  | 922  | 1164 | <b><math>\text{NH}_3\text{Zr}</math></b> | 1219 | 1063  | 708  | 855   | 1163 | <b><math>\text{NH}_3\text{Zr}</math></b> | 1253 | 1123  | 585  | 928  | 1165 |
| 312                                      | 1326 | 1143  | 1116 | 1114 | 1292 | 359                                      | 1352 | 1163  | 1116 | 1113  | 1299 | 287                                      | 1342 | 1156  | 675  | 1114 | 1296 |
| 424                                      | 1360 | 1187  | 1135 | 1188 | 1454 | 386                                      | 1387 | 1214  | 1135 | 1115  | 1454 | 300                                      | 1352 | 1214  | 1113 | 1244 | 1448 |
| 516                                      | 1543 | 1404  | 1386 | 1418 | 1483 | 441                                      | 1489 | 1420  | 1386 | 1407  | 1484 | 391                                      | 1495 | 1237  | 1392 | 1353 | 1479 |
| 1167                                     | 1549 | 1420  | 1398 | 1422 | 1488 | 1160                                     | 1587 | 1451  | 1398 | 1422  | 1487 | 1126                                     | 1559 | 1427  | 1393 | 1417 | 1489 |
| 1508                                     | 1575 | 1571  | 1547 | 1547 | 1536 | 1587                                     | 1611 | 1604  | 1547 | 1569  | 1557 | 1610                                     | 1599 | 1435  | 1592 | 1589 | 1575 |
| 1611                                     | 1594 | 1600  | 1594 | 1585 | 1569 | 1593                                     | 1612 | 1617  | 1594 | 1581  | 1576 | 1615                                     | 1603 | 1591  | 1592 | 1603 | 1600 |
| 3340                                     | 2851 | 1953  | 2978 | 3107 | 3094 | 3387                                     | 2976 | 1968  | 2978 | 3133  | 3085 | 3461                                     | 2928 | 1594  | 3160 | 2703 | 3067 |
| 3480                                     | 2961 | 2907  | 3044 | 3233 | 3178 | 3504                                     | 3076 | 2943  | 3044 | 3259  | 3168 | 3580                                     | 3022 | 3090  | 3337 | 3163 | 3149 |
| 3507                                     | 3063 | 3047  | 3114 | 3237 | 3206 | 3529                                     | 3141 | 3069  | 3114 | 3288  | 3196 | 3581                                     | 3118 | 3211  | 3339 | 3252 | 3166 |
|                                          | 3200 | 3157  | 3330 | 3366 | 3361 |                                          | 3187 | 3116  | 3330 | 3384  | 3343 |                                          | 3191 | 3224  | 3433 | 3452 | 3429 |
|                                          | 3399 | 3380  | 3441 | 3492 | 3487 |                                          | 3457 | 3452  | 3441 | 3517  | 3489 |                                          | 3444 | 3435  | 3566 | 3575 | 3552 |
|                                          | 3508 | 3508  | 3562 | 3520 | 3507 |                                          | 3577 | 3570  | 3562 | 3536  | 3539 |                                          | 3559 | 3564  | 3566 | 3585 | 3580 |
|                                          | 3608 | 3572  | 3993 | 3802 | 3598 |                                          | 3593 | 3576  | 3993 | 3748  | 3759 |                                          | 3587 | 3567  | 3896 | 3611 | 3842 |

**Table S9.** Cartesian coordinates of the MN15/TZ optimal structures without symmetry restrictions for the  $\text{NH}_3\text{ZrO} + \text{CH}_4 \rightarrow \text{NH}_3\text{Zr}^+ + \text{CH}_3\text{OH}$  reaction.

|    | Singlet             |          |          | Triplet             |          |          | Quintet              |          |          |
|----|---------------------|----------|----------|---------------------|----------|----------|----------------------|----------|----------|
|    | NH <sub>3</sub> ZrO |          |          | NH <sub>3</sub> ZrO |          |          | NH <sub>3</sub> ZrO  |          |          |
| Zr | 0.33500             | -0.32475 | -0.00003 | 0.35776             | -0.32643 | 0.00002  | 0.16023              | -0.15478 | -0.00001 |
| N  | -1.90472            | 0.20007  | -0.00016 | -1.97856            | 0.16340  | 0.00013  | -2.21648             | 0.24728  | -0.00006 |
| H  | -2.05569            | 0.77572  | 0.83216  | -2.52968            | -0.06970 | 0.82179  | -2.69768             | -0.10790 | 0.82510  |
| H  | -2.05651            | 0.78327  | -0.82691 | -1.82151            | 1.17187  | 0.00220  | -2.29008             | 1.26402  | 0.00267  |
| H  | -2.57679            | -0.56458 | -0.00322 | -2.52490            | -0.06682 | -0.82556 | -2.69789             | -0.10359 | -0.82692 |
| O  | 0.82774             | 1.32438  | 0.00002  | 0.80198             | 1.35973  | -0.00003 | 2.09897              | 0.42597  | 0.00001  |
|    | CC                  |          |          | CC                  |          |          | CC                   |          |          |
| C  | -2.49819            | -0.30699 | -0.00008 | -2.77188            | -0.28937 | -0.00067 | -2.17555             | -1.36139 | 0.03691  |
| H  | -3.58119            | -0.24417 | 0.00065  | -3.39386            | -0.30246 | 0.89041  | -1.52761             | -1.16755 | 0.90680  |
| H  | -2.13675            | 0.19642  | 0.91828  | -2.16617            | -1.20560 | 0.00227  | -1.68908             | -1.08956 | -0.91018 |
| H  | -2.13746            | 0.19991  | -0.91660 | -2.18383            | 0.63733  | 0.00163  | -3.10225             | -0.79914 | 0.14776  |
| H  | -2.22435            | -1.36865 | -0.00183 | -3.38744            | -0.30300 | -0.89615 | -2.38318             | -2.42662 | 0.00643  |
| Zr | 0.00207             | -0.14362 | -0.00001 | 0.04044             | -0.15529 | 0.00035  | 0.41075              | -0.03942 | -0.03951 |
| O  | 0.13668             | 1.58692  | 0.00003  | 0.12095             | 1.59514  | -0.00016 | 2.41760              | -0.26768 | 0.10309  |
| N  | 2.28645             | -0.40050 | -0.00001 | 2.41243             | -0.38640 | -0.00064 | -1.33889             | 1.64747  | 0.03906  |
| H  | 2.71586             | -1.32013 | 0.00039  | 2.85993             | -0.77780 | 0.82376  | -0.90160             | 2.40343  | 0.56090  |
| H  | 2.58587             | 0.11551  | -0.83155 | 2.85951             | -0.77870 | -0.82485 | -1.49604             | 1.98180  | -0.91112 |
| H  | 2.58560             | 0.11608  | 0.83128  | 2.57103             | 0.62188  | -0.00125 | -2.24535             | 1.45182  | 0.45998  |
|    | aTS1                |          |          | aTS1                |          |          | rTS1                 |          |          |
| C  | 2.21861             | -0.54656 | -0.11341 | 2.29274             | -0.62278 | 0.00040  | 2.99762              | 1.10135  | 0.00003  |
| H  | 3.19350             | -0.07062 | -0.19589 | 2.92436             | -0.53246 | -0.88590 | 2.34564              | 0.07883  | -0.00006 |
| H  | 2.17132             | -1.34635 | -0.86247 | 1.93879             | -1.66977 | -0.00025 | 3.59320              | 1.06224  | -0.90581 |
| H  | 1.57919             | 0.82569  | -0.18480 | 1.64559             | 0.74645  | 0.00027  | 2.28894              | 1.92395  | 0.00036  |
| H  | 2.17425             | -1.02635 | 0.88591  | 2.92325             | -0.53312 | 0.88756  | 3.59360              | 1.06183  | 0.90558  |
| Zr | -0.05501            | -0.15141 | 0.05704  | -0.06963            | -0.12192 | -0.00024 | -0.44669             | -0.39624 | 0.00003  |
| O  | 0.60125             | 1.54411  | -0.02329 | 0.71375             | 1.53714  | 0.00015  | 1.47213              | -0.89509 | -0.00011 |
| N  | -2.39815            | -0.14785 | -0.10242 | -2.50134            | -0.18704 | 0.00038  | -2.30016             | 1.14744  | -0.00005 |
| H  | -2.67681            | 0.51962  | -0.82421 | -2.93698            | -0.59605 | 0.82410  | -2.89331             | 1.09574  | 0.82670  |
| H  | -2.81772            | -1.04862 | -0.32208 | -2.72901            | 0.80726  | 0.00022  | -2.89322             | 1.09574  | -0.82687 |
| H  | -2.75806            | 0.16455  | 0.80563  | -2.93770            | -0.59656 | -0.82270 | -1.82890             | 2.05188  | -0.00002 |
|    | [2+2] Intermediate  |          |          | [2+2] Intermediate  |          |          | Radical Intermediate |          |          |
| C  | -1.98077            | -1.05825 | -0.00041 | 0.77533             | -1.98090 | 0.00003  | -4.63876             | 0.07948  | 0.00225  |
| H  | -2.00856            | -2.14944 | -0.00011 | 1.42214             | -2.08284 | 0.88578  | -2.29879             | -0.12715 | -0.00326 |
| H  | -2.51909            | -0.70151 | -0.89073 | 1.42287             | -2.08403 | -0.88499 | -4.67583             | -0.10172 | 1.06192  |
| H  | -0.56887            | 2.76517  | -0.00105 | -3.04904            | 0.53584  | 0.00264  | -4.84182             | -0.71991 | -0.68797 |
| H  | -2.51701            | -0.70125 | 0.89118  | 0.09500             | -2.83669 | 0.00035  | -4.43145             | 1.06874  | -0.36649 |
| Zr | -0.03799            | -0.02396 | 0.00018  | -0.19712            | 0.05583  | -0.00007 | 0.59045              | -0.01414 | -0.00044 |
| O  | -0.22370            | 1.87282  | -0.00011 | -2.09825            | 0.44166  | -0.00024 | -1.33916             | -0.08861 | -0.00216 |
| N  | 2.17776             | -0.67064 | -0.00025 | 1.91574             | 1.20741  | 0.00024  | 3.01110              | 0.06452  | 0.00164  |

|    |                                            |          |          |                                            |          |          |                                            |          |          |
|----|--------------------------------------------|----------|----------|--------------------------------------------|----------|----------|--------------------------------------------|----------|----------|
| H  | 2.59724                                    | -0.26210 | 0.84361  | 1.80156                                    | 2.21785  | -0.00230 | 3.34672                                    | 0.69012  | 0.73309  |
| H  | 2.36904                                    | -1.67028 | -0.00117 | 2.45830                                    | 0.96051  | 0.82606  | 3.39467                                    | -0.86495 | 0.16899  |
| H  | 2.59682                                    | -0.26072 | -0.84366 | 2.45797                                    | 0.95659  | -0.82466 | 3.35683                                    | 0.40091  | -0.89634 |
|    | <b>TS2</b>                                 |          |          | <b>TS2</b>                                 |          |          | <b>TS2</b>                                 |          |          |
| Zr | 0.26475                                    | 0.04716  | 0.03739  | 0.26214                                    | 0.02028  | 0.01516  | 0.21923                                    | -0.10723 | 0.05024  |
| O  | -1.56936                                   | -0.86791 | 0.08068  | -1.57560                                   | -0.87848 | 0.09531  | -1.83182                                   | -0.75388 | 0.01996  |
| C  | -2.49309                                   | 0.61914  | -0.06972 | -2.51462                                   | 0.68816  | -0.03484 | -2.07302                                   | 0.91697  | -0.04058 |
| H  | -2.27467                                   | 1.16997  | -0.97750 | -2.11494                                   | 1.38496  | -0.76025 | -1.17799                                   | 1.59209  | -0.07437 |
| H  | -2.33082                                   | 1.18784  | 0.83814  | -2.53033                                   | 1.04371  | 0.98414  | -2.63262                                   | 1.06952  | 0.87117  |
| H  | -3.44438                                   | 0.10511  | -0.08554 | -3.41249                                   | 0.18084  | -0.35489 | -2.65744                                   | 1.03897  | -0.94417 |
| H  | -1.83574                                   | -1.44202 | -0.65267 | -1.85077                                   | -1.44507 | -0.64368 | -2.15732                                   | -1.22144 | -0.77149 |
| N  | 2.57840                                    | 0.04513  | -0.07725 | 2.60720                                    | 0.10334  | -0.03455 | 2.59093                                    | 0.21323  | -0.09092 |
| H  | 3.04007                                    | 0.94772  | -0.19380 | 3.03914                                    | 0.63688  | 0.72018  | 2.93240                                    | 0.73057  | 0.71609  |
| H  | 2.92676                                    | -0.39872 | 0.77702  | 2.86666                                    | -0.88131 | 0.06709  | 3.10353                                    | -0.66236 | -0.16845 |
| H  | 2.79350                                    | -0.54353 | -0.88753 | 2.95911                                    | 0.44421  | -0.93066 | 2.77629                                    | 0.77840  | -0.91800 |
|    | <b>NH<sub>3</sub>Zr---OHCH<sub>3</sub></b> |          |          | <b>NH<sub>3</sub>Zr---OHCH<sub>3</sub></b> |          |          | <b>NH<sub>3</sub>Zr---OHCH<sub>3</sub></b> |          |          |
| Zr | 0.39657                                    | 0.02418  | -0.07848 | 0.40355                                    | 0.05759  | -0.01738 | 0.39251                                    | -0.08241 | -0.00343 |
| O  | -1.78277                                   | 0.43177  | 0.00871  | -1.81310                                   | 0.39801  | 0.02284  | -1.87064                                   | -0.42868 | -0.00227 |
| C  | -2.95692                                   | -0.39696 | 0.08309  | -2.97618                                   | -0.44142 | 0.01108  | -2.94456                                   | 0.51417  | 0.00180  |
| H  | -3.22794                                   | -0.56425 | 1.12281  | -3.53486                                   | -0.31303 | 0.93592  | -3.57046                                   | 0.38594  | -0.88071 |
| H  | -2.70829                                   | -1.34243 | -0.38663 | -2.62228                                   | -1.46493 | -0.05987 | -2.47743                                   | 1.49624  | -0.01818 |
| H  | -3.76941                                   | 0.08262  | -0.45790 | -3.59774                                   | -0.20523 | -0.85059 | -3.54168                                   | 0.41078  | 0.90703  |
| H  | -1.87583                                   | 1.25190  | 0.53155  | -2.03474                                   | 1.33855  | 0.09006  | -2.18234                                   | -1.34059 | 0.02586  |
| N  | 2.67217                                    | -0.14606 | 0.15974  | 2.69920                                    | -0.20572 | 0.04997  | 2.76642                                    | 0.25510  | -0.01025 |
| H  | 3.06472                                    | 0.75517  | -0.12816 | 3.21330                                    | 0.59809  | 0.41092  | 3.30770                                    | -0.50588 | -0.41255 |
| H  | 2.84748                                    | -0.30577 | 1.15581  | 3.01116                                    | -1.05298 | 0.52547  | 3.08682                                    | 1.13732  | -0.40115 |
| H  | 3.10499                                    | -0.89448 | -0.38475 | 2.89069                                    | -0.29957 | -0.95572 | 2.94427                                    | 0.27150  | 0.99597  |
|    | <b>ZrNH<sub>3</sub></b>                    |          |          | <b>ZrNH<sub>3</sub></b>                    |          |          | <b>ZrNH<sub>3</sub></b>                    |          |          |
| Zr | 0.48071                                    | 0.00000  | -0.00295 | 0.48365                                    | 0.00001  | -0.00067 | 0.50919                                    | 0.00019  | 0.00017  |
| N  | -1.81780                                   | 0.00001  | -0.01976 | -1.82660                                   | 0.00003  | -0.00545 | -1.92559                                   | 0.00134  | 0.00121  |
| H  | -2.29908                                   | 0.82642  | -0.37611 | -2.21695                                   | 0.82982  | -0.45477 | -2.28963                                   | -0.80214 | 0.50754  |
| H  | -2.29806                                   | -0.82813 | -0.37346 | -2.21618                                   | -0.83060 | -0.45391 | -2.31860                                   | 0.83662  | 0.42812  |
| H  | -1.90656                                   | 0.00154  | 1.00581  | -2.12649                                   | 0.00037  | 0.97381  | -2.28007                                   | -0.05147 | -0.95068 |
